# Supplementary material
Source: publisher figshare collection journal article supplement (https://aacr.figshare.com/articles/dataset/_/22692361)
Supplement: Supplementary file 1 [file 40287484]

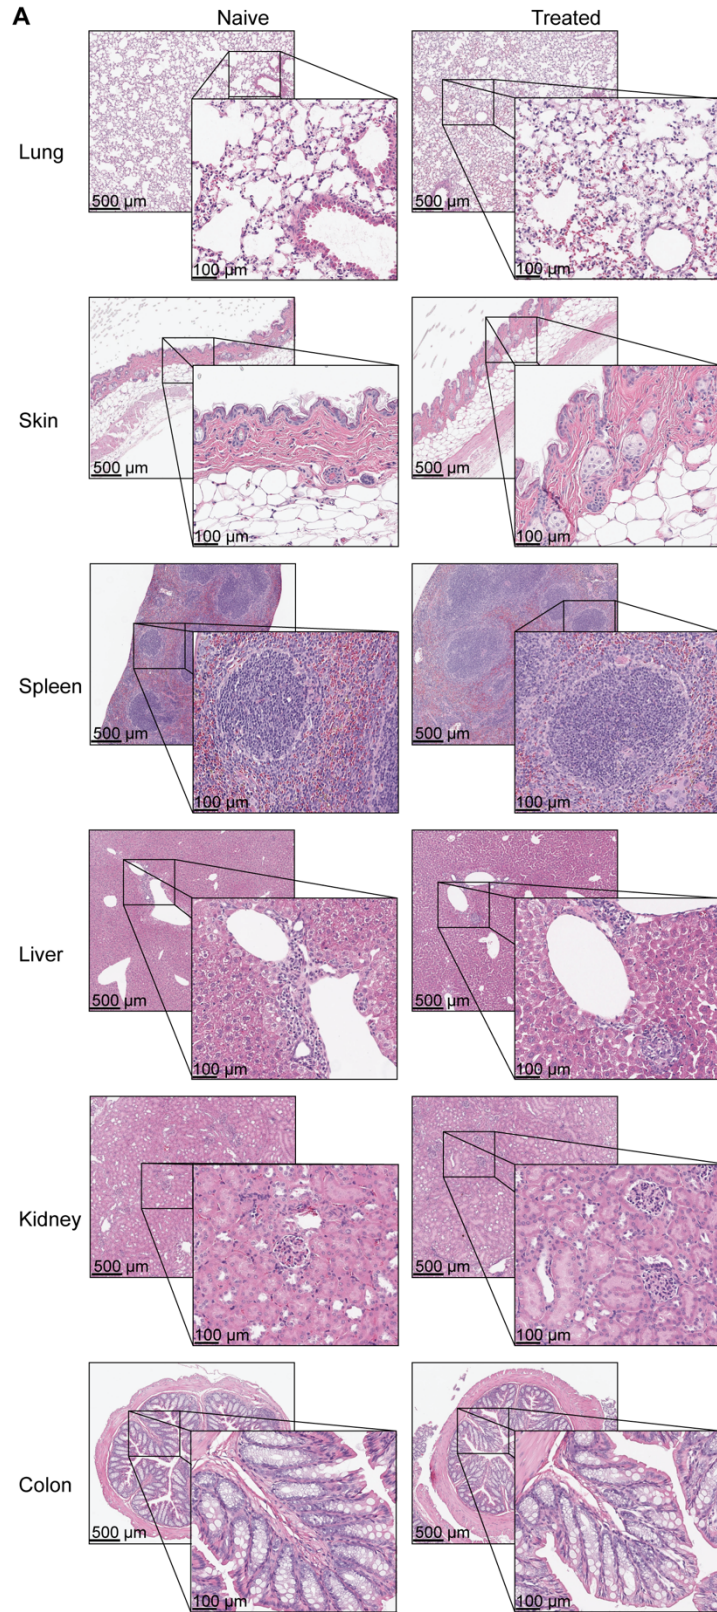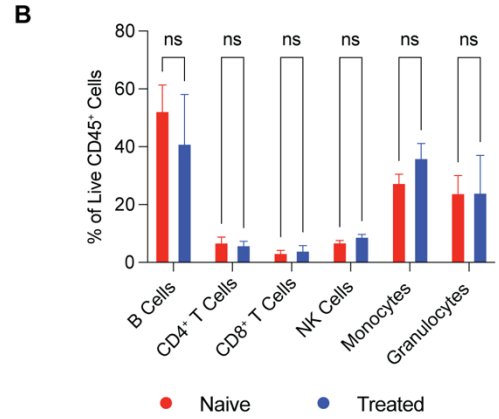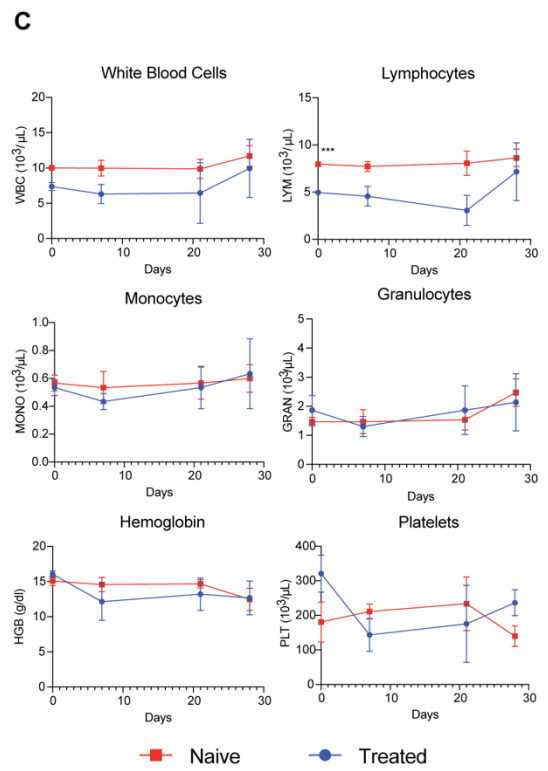

**Supplemental Figure S2: In vivo TR-APC induction results in no observable off-target toxicity.** **A**, Histological analysis of organs of commonly impacted by autoimmune infiltration from naïve mice or mice 30 days following *in vivo* TR-APC induction. **B**, Flow cytometric analysis of hematopoietic lineage frequencies in the peripheral blood of animals as in **A**. **C**, Complete blood counts of murine peripheral blood from naïve mice or mice throughout *in vivo* TR-APC induction.
